# Supplementary material for: Rapid Extraction and Detection of African Swine Fever Virus DNA Based on Isothermal Recombinase Polymerase Amplification Assay
Source: MDPI journal article supplement (doi:10.3390/v13091731), 2021-08-31
Supplement: s1 [file s1]

## Supplementary file #1

# Rapid extraction and detection of African swine fever virus DNA based on isothermal recombinase polymerase amplification assay

Arianna Ceruti<sup>1\*</sup>, Rea Maja Kobialka<sup>1</sup>, Judah Ssekitoleko<sup>2</sup>, Julius Boniface Okuni<sup>2</sup>, Sandra Blome<sup>3</sup>, Ahmed Abd El Wahed<sup>1</sup>, Uwe Truyen<sup>1</sup>

<sup>1</sup> Institute of Animal Hygiene and Veterinary Public Health, Leipzig University, Germany; [rea\\_maja.kobialka@uni-leipzig.de](mailto:rea_maja.kobialka@uni-leipzig.de), [ahmed.abd\\_el\\_wahed@uni-leipzig.de](mailto:ahmed.abd_el_wahed@uni-leipzig.de), [truyen@vetmed.uni-leipzig.de](mailto:truyen@vetmed.uni-leipzig.de),

<sup>2</sup> College of Veterinary Medicine, Animal Resources and Biosecurity (COVAB), Makerere University, Uganda; [jsekitoleko2810@gmail.com](mailto:jsekitoleko2810@gmail.com), [ibokuni@gmail.com](mailto:ibokuni@gmail.com)

<sup>3</sup> Friedrich-Loeffler-Institut, Institute of Diagnostic Virology, Greifswald, Germany; [Sandra.Blome@fli.de](mailto:Sandra.Blome@fli.de)

\* Correspondence: [ahmed.abd\\_el\\_wahed@uni-leipzig.de](mailto:ahmed.abd_el_wahed@uni-leipzig.de)

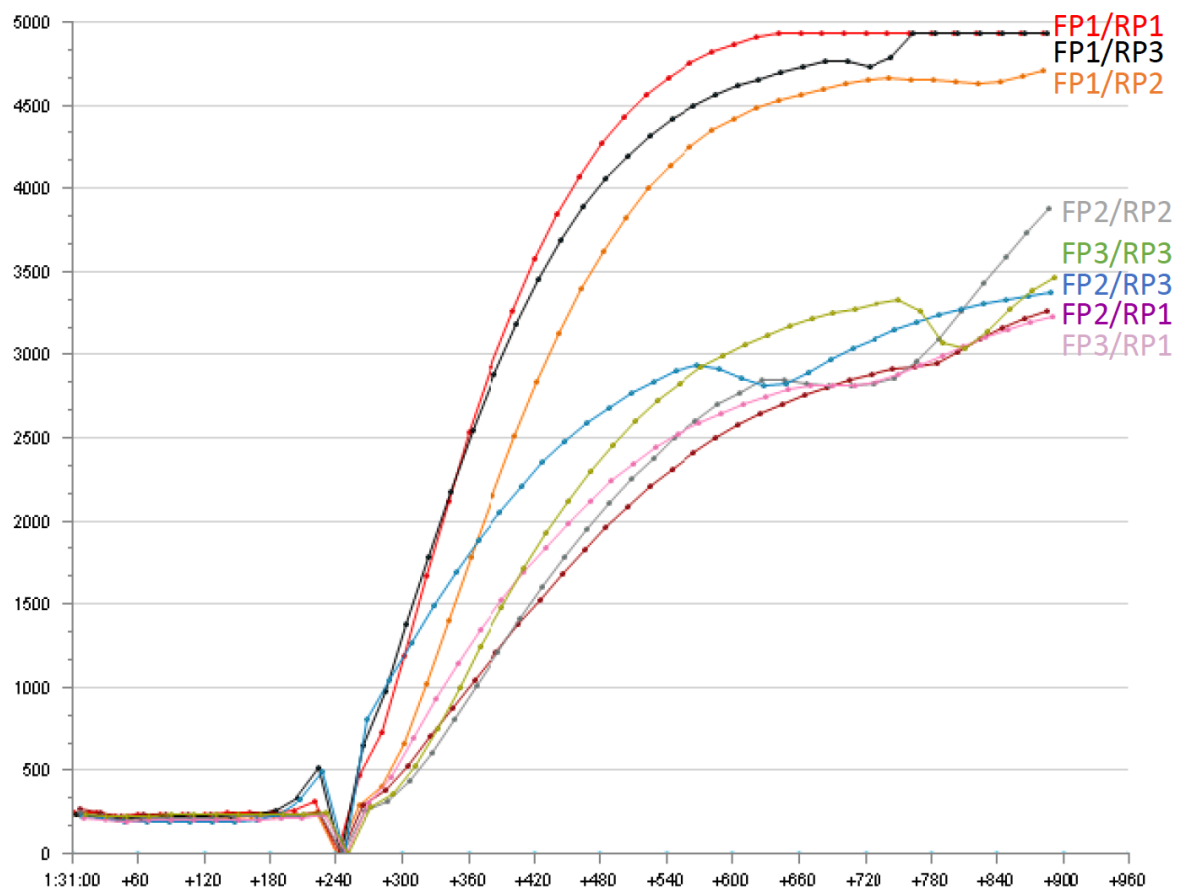

Figure S1. Possible primer combinations tested with  $5 \times 10^5$  ASFV molecular standard. FP1/RP3 had the fastest TT and maximal fluorescence signal.

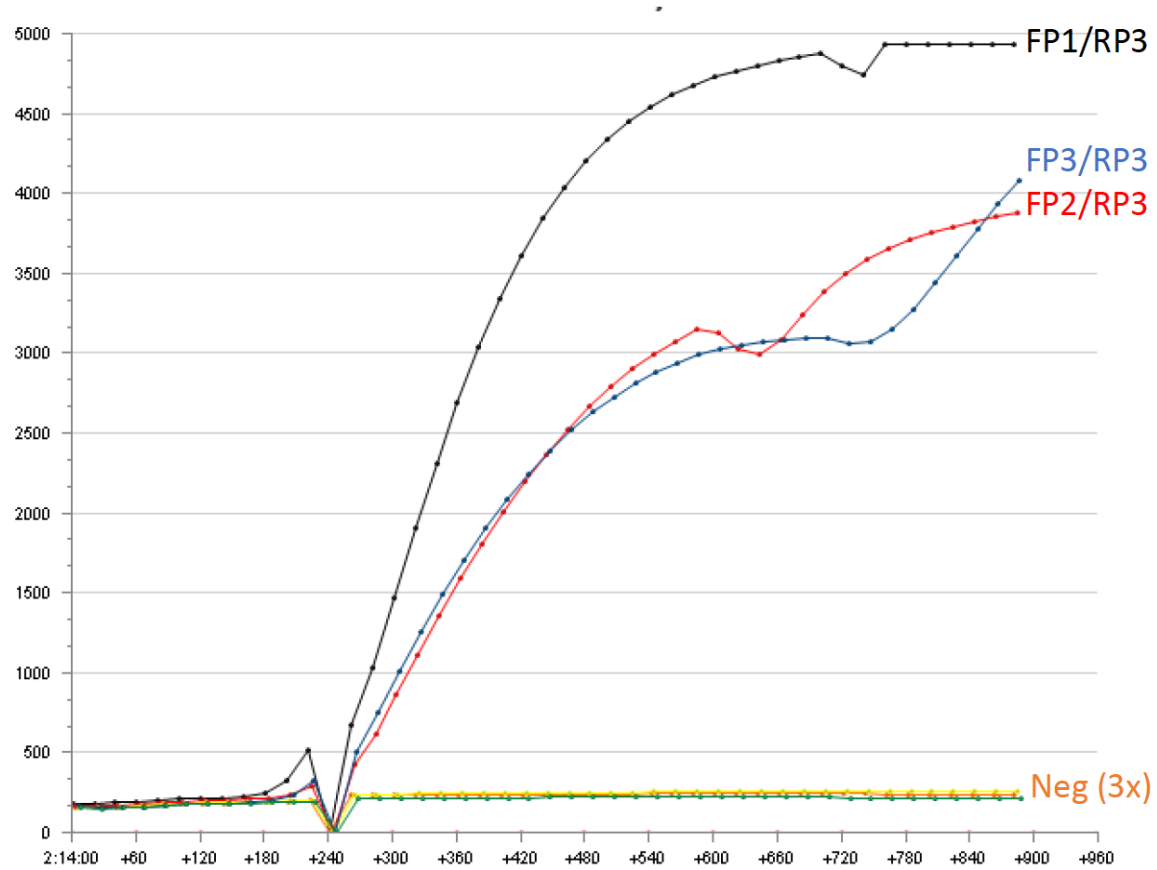

Figure S2. The three best primer combinations tested with  $5 \times 10^5$  ASFV molecular standard.

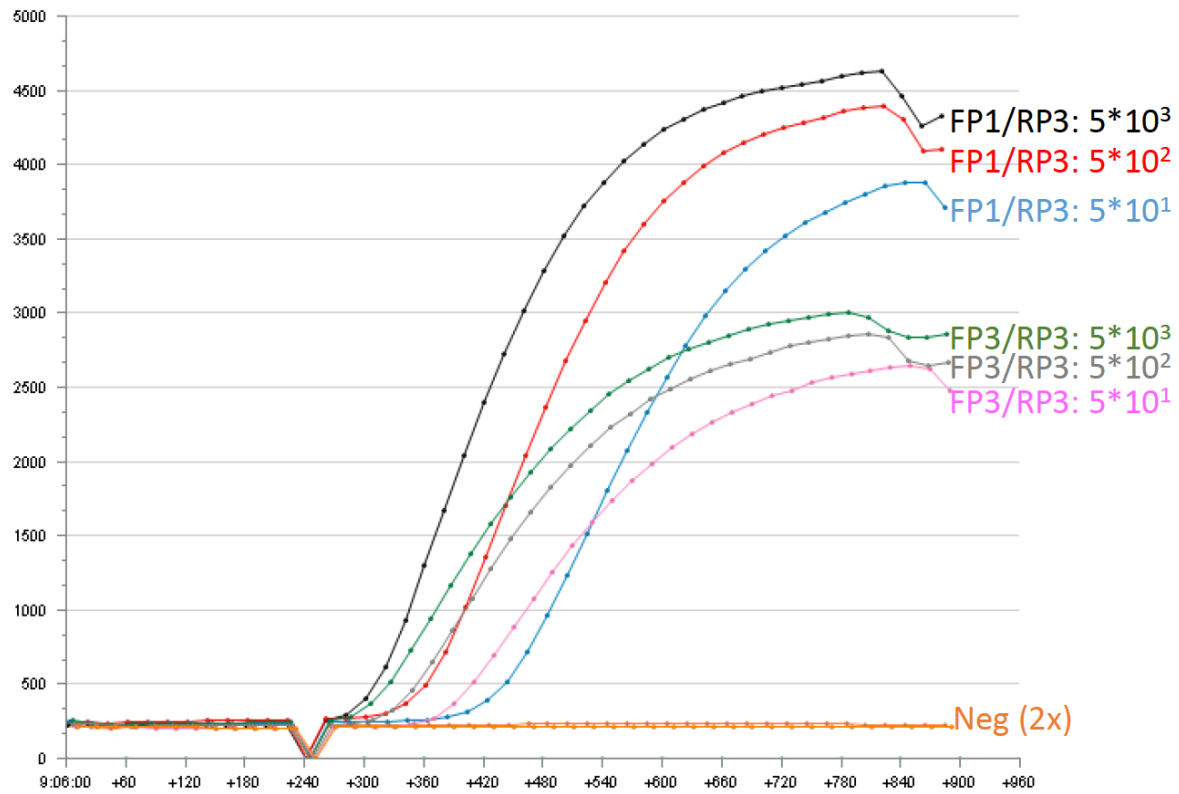

**Figure S3.** The two best primer combinations were tested with  $5 \times 10^{3-1}$  ASFV molecular standard. FP1/RP3 was confirmed to perform best.

**Table S1. ASFV positive samples.** ASFV Genotype and sample matrix were listed.

| Sample ID | Matrix             | Genotype | RPA    |          |
|-----------|--------------------|----------|--------|----------|
|           |                    |          | Result | TT (min) |
| 1         | Spleen             | I        | pos    | 2.35     |
| 2         | Lung               | I        | pos    | 3.05     |
| 3         | Macrophage culture | I        | pos    | 3.01     |
| 4         | Macrophage culture | I        | pos    | 3.43     |
| 5         | Spleen             | II       | pos    | 4.73     |
| 6         | Lung               | II       | pos    | 4.76     |
| 7         | Macrophage culture | II       | pos    | 3.72     |
| 8         | Blood              | II       | pos    | 4.73     |
| 9         | Blood              | II       | pos    | 4.76     |
| 10        | Blood              | II       | pos    | 3.35     |
| 11        | Blood              | II       | pos    | 4.66     |
| 12        | Blood              | II       | pos    | 3.06     |
| 13        | Blood              | II       | pos    | 4.83     |
| 14        | Blood              | II       | pos    | 4.76     |
| 15        | Blood              | II       | pos    | 4.80     |
| 16        | Blood              | II       | pos    | 4.81     |
| 17        | Blood              | II       | pos    | 5.01     |
| 18        | Blood              | II       | pos    | 3.05     |
| 19        | Blood              | II       | pos    | 3.40     |

|    |                    |      |     |      |
|----|--------------------|------|-----|------|
| 20 | Blood              | II   | pos | 3.43 |
| 21 | Blood              | II   | pos | 3.11 |
| 22 | Blood              | II   | pos | 3.48 |
| 23 | Blood              | II   | pos | 3.38 |
| 24 | Blood              | IV   | pos | 6.01 |
| 25 | Blood              | IV   | pos | 2.71 |
| 26 | Blood              | IV   | pos | 2.68 |
| 27 | Blood              | IV   | pos | 2.73 |
| 28 | Blood              | IV   | pos | 3.43 |
| 29 | Spleen             | IX   | pos | 3.12 |
| 30 | Lung               | IX   | pos | 3.48 |
| 31 | Macrophage culture | IX   | pos | 3.73 |
| 32 | Blood              | XI   | pos | 4.76 |
| 33 | Blood              | XI   | pos | 4.78 |
| 34 | Blood              | XI   | pos | 4.81 |
| 35 | Blood              | XII  | pos | 4.45 |
| 36 | Blood              | XII  | pos | 4.48 |
| 37 | Blood              | XII  | pos | 5.01 |
| 38 | Blood              | XII  | pos | 4.71 |
| 39 | Blood              | XII  | pos | 3.40 |
| 40 | Blood              | XIII | pos | 4.83 |
| 41 | Blood              | XIII | pos | 4.86 |
| 42 | Blood              | XIII | pos | 4.68 |
| 43 | Blood              | XIX  | pos | 4.76 |
| 44 | Blood              | XIX  | pos | 4.78 |
| 45 | Blood              | XIX  | pos | 4.81 |
| 46 | Blood              | XIX  | pos | 5.01 |
| 47 | Blood              | XIX  | pos | 5.05 |

---

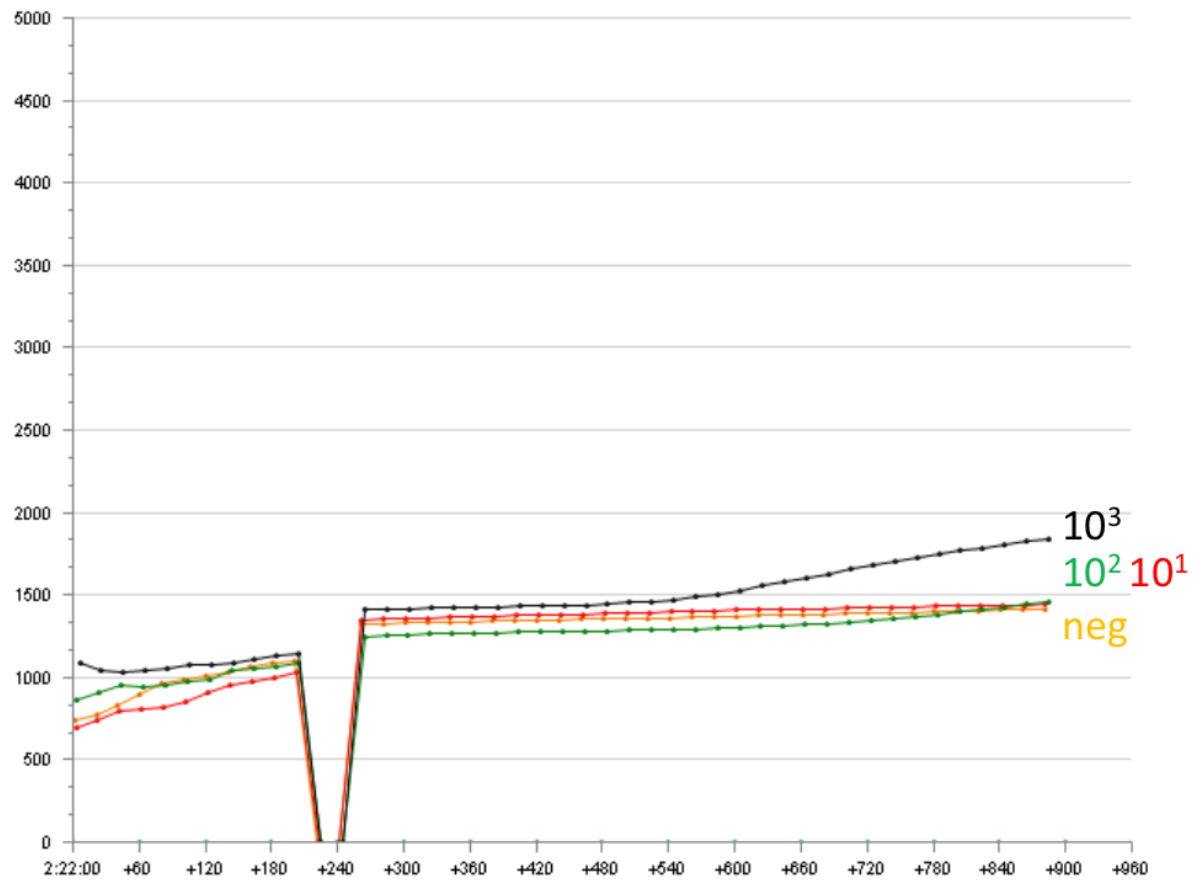

Figure S4. RPA assay using  $10^{3-1}$  of the ASFV molecular standard based on Wang et al. 2020. Background was very high and only  $10^3$  showed a late weak signal.
